# Supplementary material for: Neutrophil Maturation, Reactivity and Granularity Research Parameters to Characterize and Differentiate Convalescent Patients from Active SARS-CoV-2 Infection
Source: MDPI journal article supplement (doi:10.3390/cells10092332), 2021-09-06
Supplement: s1 [file s1]

## Supplementary Materials:

**Table S1.** Proportion of Sysmex parameters connected with neutrophils in patients with COVID-19 and convalescent patients (in the convalescent group are the same patient after COVID-19 recovery). Data expressed as median (Q1–Q3). ). A \* was marked P statistically significant.

| Sysmex Parameters<br>[median (Q1–Q3)] |                          | A.<br>COVID-19<br><i>n</i> =46 | B.<br>Convalescent Patients<br><i>n</i> = 46 | * <i>p</i> < 0,05<br>The Mann–Whitney U<br>Test |
|---------------------------------------|--------------------------|--------------------------------|----------------------------------------------|-------------------------------------------------|
| -                                     | IG [10 <sup>3</sup> /μL] | 0.04 (0.02–0.11)               | 0.08 (0.03–0.20)                             | * <i>p</i> = 0.0013                             |
| -                                     | IG [%]                   | 0.5 (0.3–1.0)                  | 1.0 (0.4–2.3)                                | <i>p</i> = 0.0567                               |
| -                                     | NEUT-RI [FI]             | 46.8 (44.6–48.4)               | 44.0 (42.4–45.4)                             | * <i>p</i> < 0.0001                             |
| -                                     | NEUT-GI [SI]             | 152.4 (146.4–157.0)            | 153.1 (150.1–156.2)                          | <i>p</i> = 0.1689                               |
| -                                     | NE-FSC [ch]              | 87.2 (84.6–90.0)               | 87.4 (85.1–90.5)                             | <i>p</i> = 0.7581                               |
| -                                     | NE-WX                    | 321 (303–344)                  | 338 (322–352)                                | <i>p</i> = 0.0573                               |
| -                                     | NE-WY                    | 608 (585–649)                  | 617 (597–647)                                | <i>p</i> = 0.2569                               |
| -                                     | NE-WZ                    | 589 (570–610)                  | 578 (557–630)                                | <i>p</i> = 0.6702                               |

Abbreviations: ch, channel unity; IG, Immature Granulocyte count; NE-FSC, size or volume of neutrophils; NEUT-GI, neutrophil granularity index; NEUT-RI, neutrophil reactive index; NE-WX, reflects the width of dispersion of neutrophils population, respect to neutrophil side-scatter (NE-SSC); NE-WY, represents the fluorescence distribution width of neutrophil population, respect to neutrophil fluorescence intensity (NE-SFL); NE-WZ, reflects the distribution width of neutrophils population, respect to neutrophil forward scatter (NE-FSC) It is proportional to the width of dispersion of neutrophil cell size

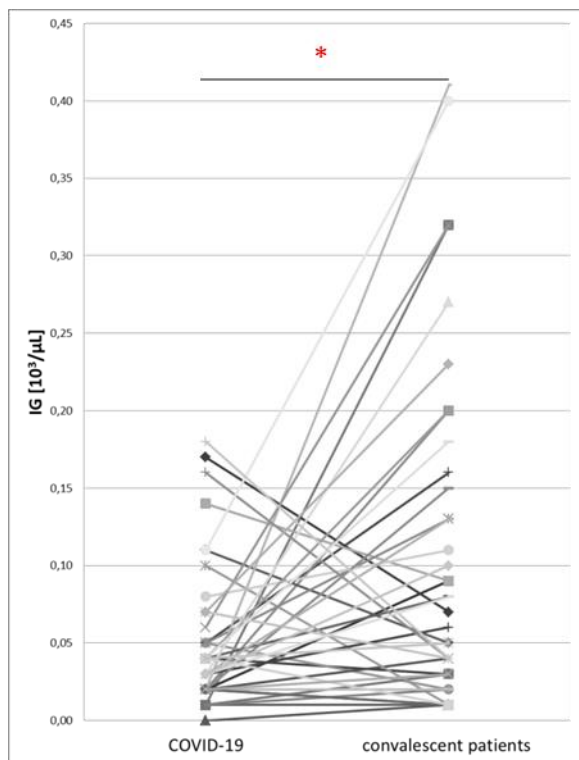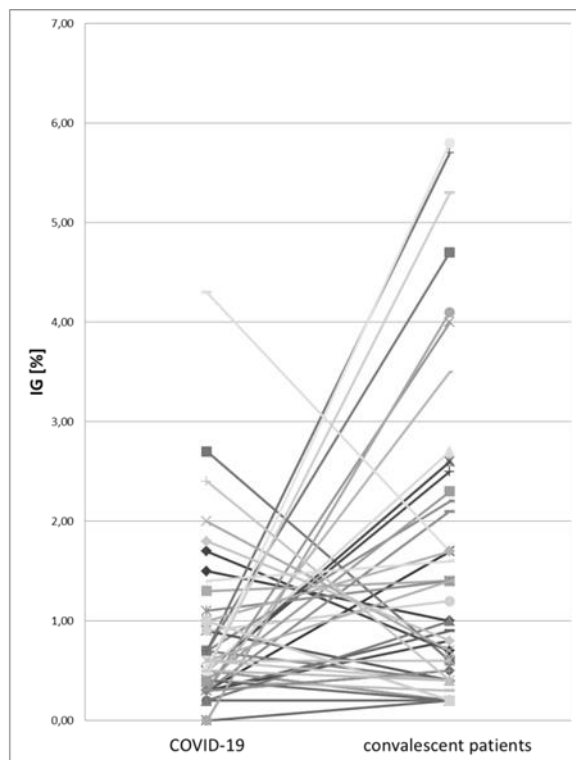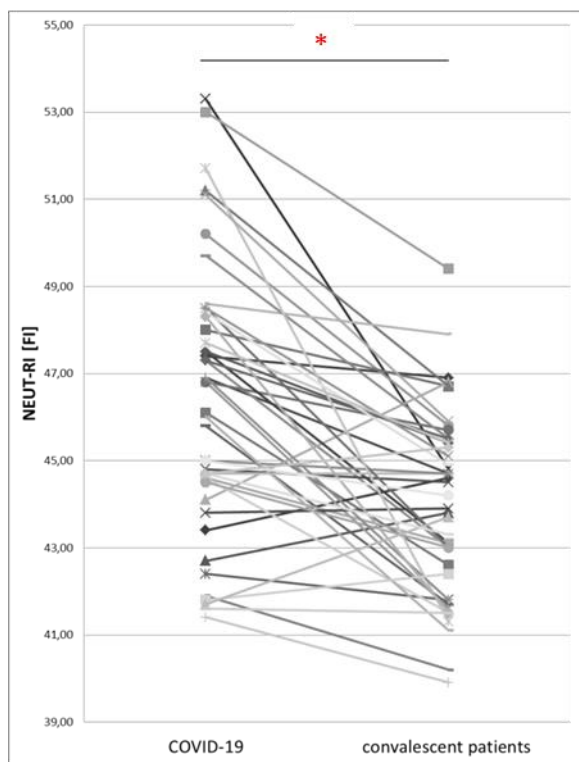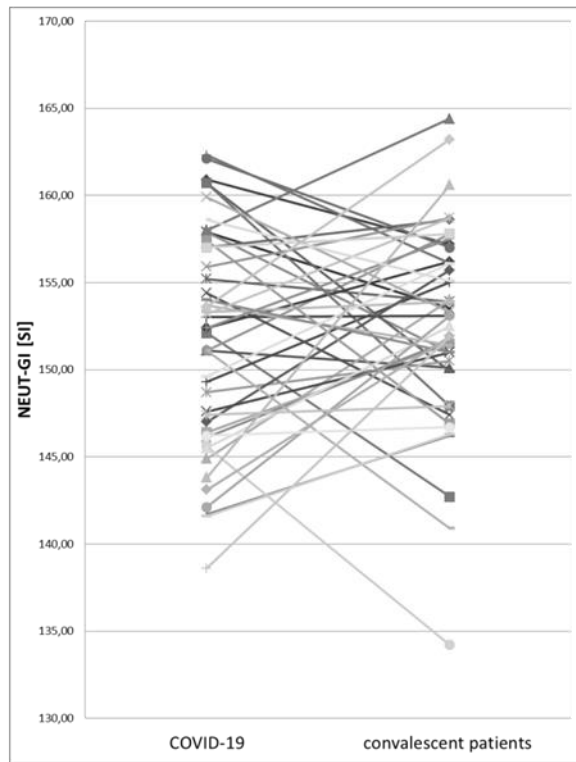

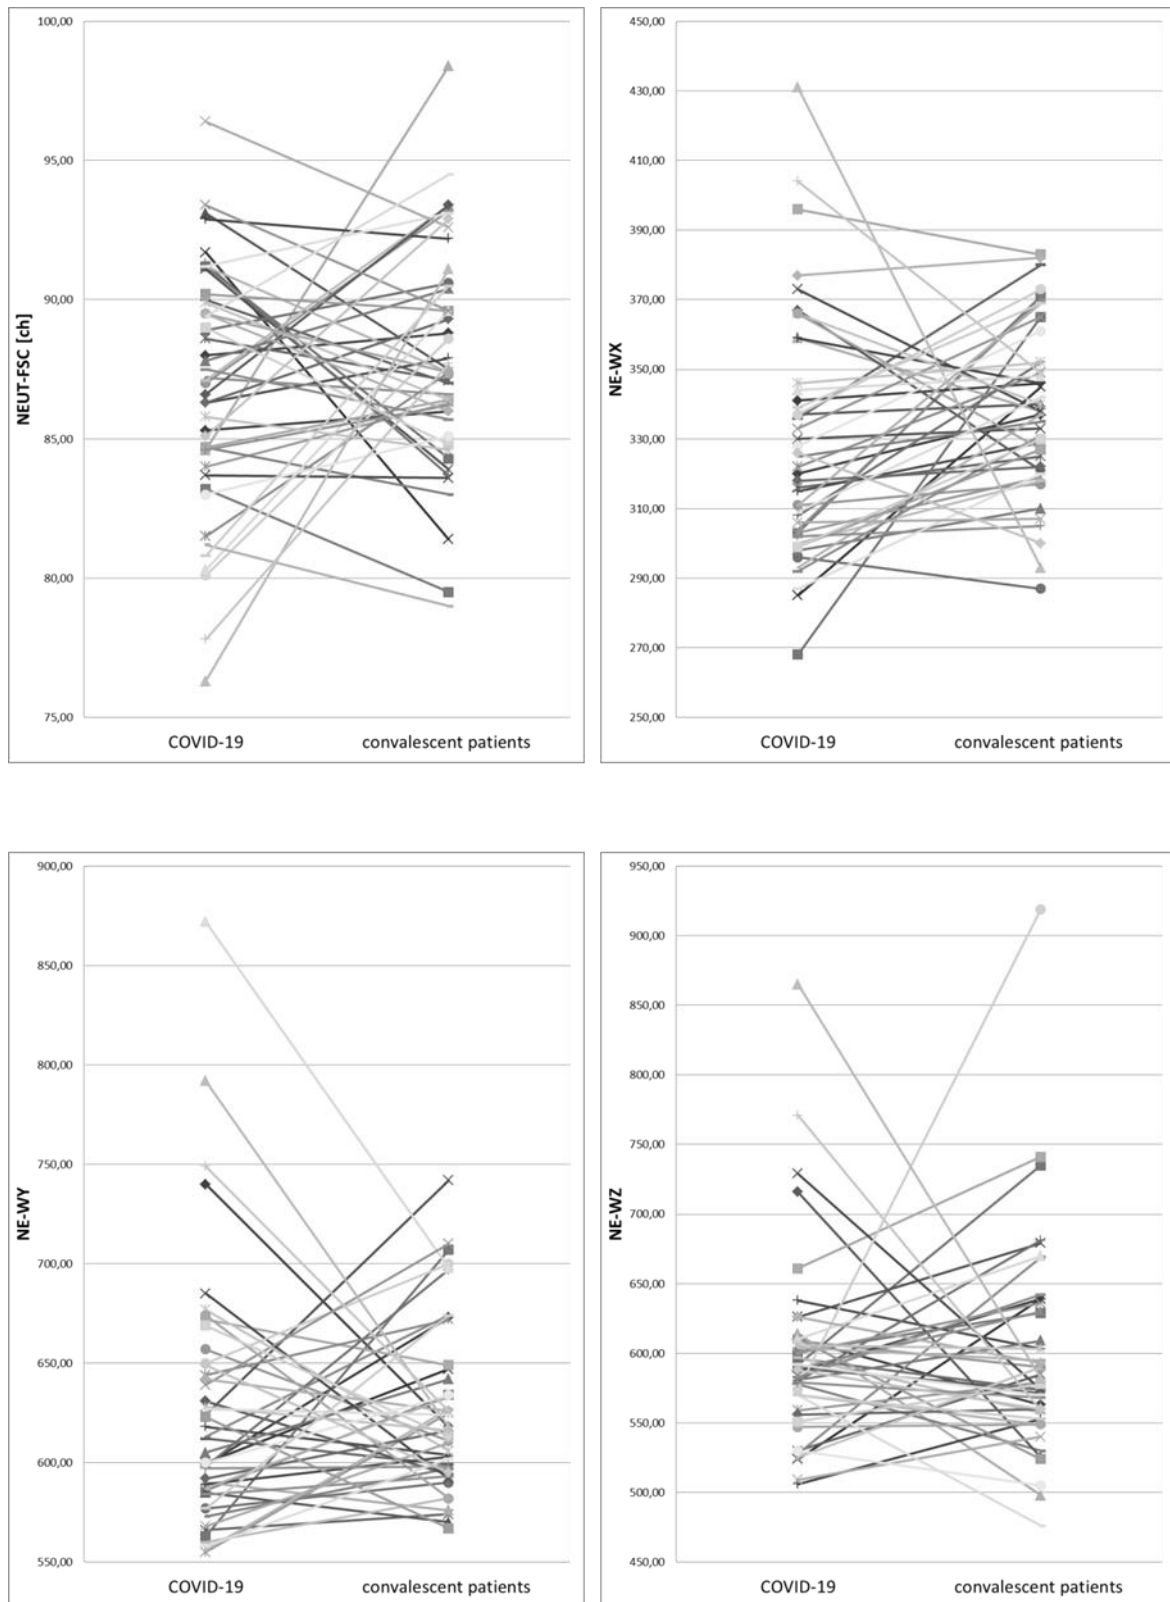

**Figure S1.** The differences in the proportion of Sysmex parameters connected with neutrophils in individual patient with COVID-19 and in the same patient after COVID-19 recovery ( $n = 46$ ). A \* was marked P statistically significant.

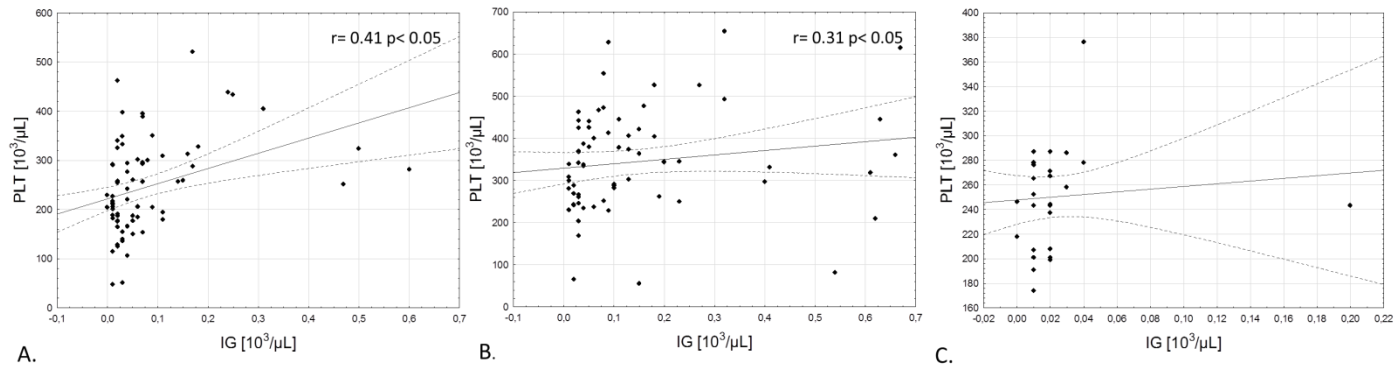

**Figure S2.** The correlations between proportion of plates counts (PLT) and proportion of immature granulocyte count (IG): **A.** in patients with COVID-19, **B.** convalescent patients and **C.** healthy control.

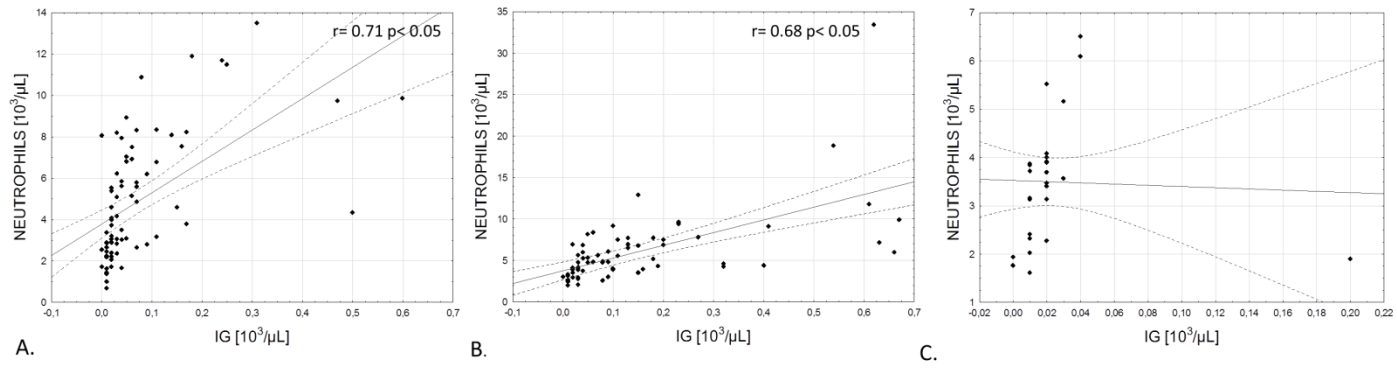

**Figure S3.** The correlations between proportion of absolute counts of neutrophils and proportion of immature granulocyte count (IG): **A.** in patients with COVID-19, **B.** convalescent patients and **C.** healthy control.
